# Supplementary material
Source: Springer Nature journal article supplement (https://www.springermedizin.de/resource/supplementary/12911_2012_613_MOESM1_ESM.pdf/9525910)
Supplement: MOESM1 [file 9525910]

### Additional File 1. IPDAS criteria met by video and handbook decision aid

| Criteria                                                                                                                                | Handbook | Video          |
|-----------------------------------------------------------------------------------------------------------------------------------------|----------|----------------|
| <b>Content: Does the patient decision aid...</b>                                                                                        |          |                |
| <b>Provide information about options in sufficient detail or decision making?</b>                                                       |          |                |
| • Describe the health condition                                                                                                         | •        | •              |
| • List the options                                                                                                                      | •        | •              |
| • List the option of doing nothing                                                                                                      | •        | •              |
| • Describe the natural course without options                                                                                           | •        | •              |
| • Describe procedures                                                                                                                   | •        | •              |
| • Describe positive features (benefits)                                                                                                 | •        | •              |
| • Describe negative features of options (harms/side effects/ disadvantages)                                                             | •        | •              |
| • Include chances of positive/negative outcomes                                                                                         | •        | •              |
| <b>Present probabilities of outcomes in an unbiased and understandable way?</b>                                                         |          |                |
| • Use event rates specifying the population and time period                                                                             | •        | Not applicable |
| • Compare outcome probabilities using the same denominator, time period, scale                                                          | •        | Not applicable |
| • Describe uncertainty around probabilities                                                                                             | •        | Not applicable |
| • Use visual diagrams                                                                                                                   | •        | Not applicable |
| • Use multiple methods to view probabilities (words, numbers, diagrams)                                                                 | •        | Not applicable |
| • Allows the patient to select a way of viewing probabilities (words, numbers, diagrams)                                                | •        | Not applicable |
| • Allow patient to view probabilities based on their own situation (e.g. age)                                                           | Not met  | Not applicable |
| • Place probabilities in context of other events                                                                                        | •        | Not applicable |
| • Use both positive and negative frames (e.g. showing both survival and death rates)                                                    | •        | Not applicable |
| <b>Include methods for clarifying and expressing patients' values?</b>                                                                  |          |                |
| • Describe the procedures and outcomes to help patients imagine what it is like to experience their physical, emotional, social effects | •        | •              |
| • Ask patients to consider which positive and negative features matter most                                                             | •        | •              |
| • Suggest ways for patients to share what matters most with others                                                                      | •        | •              |
| <b>Include structured guidance in deliberation and communication?</b>                                                                   |          |                |
| • Provide steps to make a decision                                                                                                      | •        | •              |

| <b>Criteria</b>                                                                                                                                                                      | <b>Handbook</b> | <b>Video</b>   |
|--------------------------------------------------------------------------------------------------------------------------------------------------------------------------------------|-----------------|----------------|
| <ul style="list-style-type: none"> <li>• Suggest ways to talk about the decision with a health professional</li> </ul>                                                               | •               | •              |
| <ul style="list-style-type: none"> <li>• Include tools (worksheet, question list) to discuss options with others</li> </ul>                                                          | •               | •              |
| <b>Development Process: Does the patient decision aid...</b>                                                                                                                         |                 |                |
| <b>Present information in a balanced manner?</b>                                                                                                                                     |                 |                |
| <ul style="list-style-type: none"> <li>• Able to compare positive/negative features of options</li> </ul>                                                                            | •               | •              |
| <ul style="list-style-type: none"> <li>• Shows negative/positive features with equal detail (fonts, order, display of statistics)</li> </ul>                                         | •               | •              |
| <b>Have a systematic development process?</b>                                                                                                                                        |                 |                |
| <ul style="list-style-type: none"> <li>• Include developers' credentials/qualifications</li> </ul>                                                                                   | •               | •              |
| <ul style="list-style-type: none"> <li>• Finds out what users (patients, practitioners) need to discuss options</li> </ul>                                                           | •               | •              |
| <ul style="list-style-type: none"> <li>• Has peer review by patient/professional experts not involved in development and field testing</li> </ul>                                    | •               | •              |
| <ul style="list-style-type: none"> <li>• Is field tested with users (patients facing the decision; practitioners presenting options)</li> </ul>                                      | •               | •              |
| <b>The field tests with users (patients, practitioners) show the patient decision aid is:</b>                                                                                        |                 |                |
| <ul style="list-style-type: none"> <li>• Acceptable</li> </ul>                                                                                                                       | •               | •              |
| <ul style="list-style-type: none"> <li>• Balanced for undecided patients</li> </ul>                                                                                                  | •               | •              |
| <ul style="list-style-type: none"> <li>• Understood by those with limited reading skills</li> </ul>                                                                                  | •               | •              |
| <b>Use up to date scientific evidence that is cited in a reference section or technical document?</b>                                                                                |                 |                |
| <ul style="list-style-type: none"> <li>• Provides references to evidence used</li> </ul>                                                                                             | Not met         | Not met        |
| <ul style="list-style-type: none"> <li>• Report steps to find, appraise, summarize evidence</li> </ul>                                                                               | •               | •              |
| <ul style="list-style-type: none"> <li>• Report date of last update</li> </ul>                                                                                                       | •               | •              |
| <ul style="list-style-type: none"> <li>• Report how often patient decision aid is updated</li> </ul>                                                                                 | •               | •              |
| <ul style="list-style-type: none"> <li>• Describe quality of scientific evidence (including lack of evidence)</li> </ul>                                                             | •               | Not applicable |
| <ul style="list-style-type: none"> <li>• Uses evidence from studies of patients similar to those of target audience</li> </ul>                                                       | •               | •              |
| <b>Disclose conflicts of interest?</b>                                                                                                                                               |                 |                |
| <ul style="list-style-type: none"> <li>• Report source of funding to develop and distribute the patient decision aid</li> </ul>                                                      | •               | •              |
| <ul style="list-style-type: none"> <li>• Report whether authors or their affiliations stand to gain or lose by choices patients make after using the patient decision aid</li> </ul> | Not met         | Not met        |
| <b>Use plain language?</b>                                                                                                                                                           |                 |                |
| <ul style="list-style-type: none"> <li>• Is written at a level that can be understood by the majority of patients in the target group</li> </ul>                                     | •               | •              |
| <ul style="list-style-type: none"> <li>• Is written at a grade 8 equivalent level or less according to readability score (SMOG or FRY)</li> </ul>                                    | •               | •              |

| Criteria                                                                                                                                                        | Handbook       | Video         |
|-----------------------------------------------------------------------------------------------------------------------------------------------------------------|----------------|---------------|
| <ul style="list-style-type: none"> <li>Provides ways to help patients understand information other than reading (audio, video, in-person discussion)</li> </ul> | •              | •             |
| <b>Meet additional criteria <u>if</u> stories are used in the patient decision aid?</b>                                                                         |                |               |
| <ul style="list-style-type: none"> <li>Use stories that represent a range of positive and negative experiences</li> </ul>                                       | Not applicable | •             |
| <ul style="list-style-type: none"> <li>Reports if there was a financial or other reason why patients decided to share their story</li> </ul>                    | Not applicable | •             |
| <ul style="list-style-type: none"> <li>State in an accessible document that the patient gave informed consent to use their stories</li> </ul>                   | Not applicable | Not met       |
| <b>Effectiveness: Does the patient decision aid ensure decision making is informed and values based?</b>                                                        |                |               |
| <b>Decision processes leading to decision quality. The patient decision aid helps patients to...</b>                                                            |                |               |
| <ul style="list-style-type: none"> <li>Recognize a decision needs to be made</li> </ul>                                                                         | •              | •             |
| <ul style="list-style-type: none"> <li>Know options and their features</li> </ul>                                                                               | •              | •             |
| <ul style="list-style-type: none"> <li>Understand that values affect decision</li> </ul>                                                                        | •              | •             |
| <ul style="list-style-type: none"> <li>Be clear about option features that matter most</li> </ul>                                                               | •              | •             |
| <ul style="list-style-type: none"> <li>Discuss values with their practitioner</li> </ul>                                                                        | •              | •             |
| <ul style="list-style-type: none"> <li>Become involved in preferred ways</li> </ul>                                                                             | •              | •             |
| <b>Decision quality. The patient decision aid...</b>                                                                                                            |                |               |
| <ul style="list-style-type: none"> <li>Improves the match between the chosen option and the features that matter most to the informed patient</li> </ul>        | Ongoing study  | Ongoing study |

\*International Patient Decision Aids Standards (IPDAS) Collaboration. Developing a quality criteria framework for patient decision aids: online international Delphi consensus process. *BMJ*. 2007; 333(7565):417.
